# Supplementary material for: Arbuscular mycorrhizal symbiosis mitigates the negative effects of salinity on durum wheat
Source: PubMed Central journal article supplement (PMC5587292; doi:10.1371/journal.pone.0184158), 2017-09-06
Supplement: pone.0184158.s001.pdf [file pone.0184158.s001.pdf]

## Supporting information

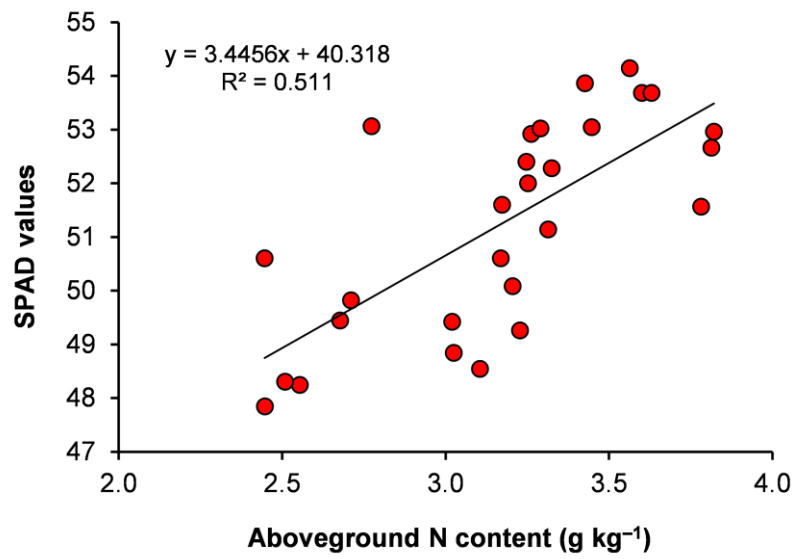

**S1 Fig. Relationship between the aboveground N concentration and the SPAD values.** The traits were measured in durum wheat grown under no- and saline-stress and in the presence or absence of arbuscular mycorrhizal symbiosis.
